# Supplementary material
Source: publisher figshare collection journal article supplement (https://springernature.figshare.com/ndownloader/files/15176120)
Supplement: Supplementary file 1 [file 15176120]

## Sheet: Sheet1
Dataset description	Repository name	Persistent link to dataset
Microarray based gene expression data from ILC tumors in the RATHER cohort.	NCBI Gene Expression Omnibus (GEO)	http://identifiers.org/geo:GSE68057
Microarray based gene expression data from ILC tumors in the UQCCR cohort.	NCBI GEO	http://identifiers.org/geo:GSE98528
Gene expression raw data of the METABRIC cohort	European Genome-Phenome Archive (EGA):	https://identifiers.org/ega.dataset:EGAD00010000268
Genotype raw data of the METABRIC cohort.	European Genome-Phenome Archive (EGA):	https://identifiers.org/ega.dataset:EGAD00010000266
Copy number aberration (CNA) data in the ILC METABRIC discovery set.	European Genome-Phenome Archive (EGA):	https://identifiers.org/ega.dataset:EGAD00010000213
Copy number variants (CNV) data in the ILC METABRIC discovery set.	European Genome-Phenome Archive (EGA):	https://identifiers.org/ega.dataset:EGAD00010000214
Copy number aberration (CNA) data in the ILC METABRIC validation set.	European Genome-Phenome Archive (EGA):	https://identifiers.org/ega.dataset:EGAD00010000215
Copy number variants (CNV) data in the ILC METABRIC validation set.	European Genome-Phenome Archive (EGA):	https://identifiers.org/ega.dataset:EGAD00010000216
Note: Additional datasets analysed during this study are available from TCGA data portal, data status as at May 15, 2014		http://cancergenome.nih.gov/
